# Supplementary material for: Phase-selective hydrothermal synthesis of Cu2ZnSnS4nanocrystals: the effect of the sulphur precursor
Source: Royal Society of Chemistry journal article supplement (doi:10.1039/c3ce42606h), 2014-01-01
Supplement: c3ce42606h1.pdf [file c3ce42606h1.pdf]

## Supplementary Information

### Phase-Selective Hydrothermal Synthesis of $\text{Cu}_2\text{ZnSnS}_4$ Nanocrystals: The Effect of Sulphur Precursor

Vincent Tiing Tiong,<sup>a</sup> Yi Zhang,<sup>b</sup> John Bell<sup>a</sup> and Hongxia Wang<sup>\*a</sup>

<sup>a</sup> School of Chemistry, Physics and Mechanical Engineering, Science and Engineering Faculty, Queensland University of Technology, Brisbane, QLD 4001, Australia

<sup>b</sup> Institute of Photoelectronic Thin Film Devices and Technology, Nankai University, Tianjin 300071, China

The XRD patterns of  $\text{Cu}_2\text{ZnSnS}_4$  (CZTS) with wurtzite structures were simulated using Visualization System for Electronic and Structural Analysis (VESTA) and CCDC Mercury 3.0 softwares. The crystal data of the wurtzite-kesterite CZTS is listed in Table S1. The crystal structure representation is shown in Figure S1.

Powder x-ray diffraction patterns of CZTS\_TAA were analysed using the Total Pattern Analysis Solutions (TOPAS) version 4.1 software. The Rietveld method was employed. The included CuK $\alpha$ 5 emission profile was used. The background was modelled with a 5<sup>th</sup> order Chebyshev and also a One\_on\_X function. The profile was fitted using a PV-TCHZ (modified Thomson-Cox-Hastings pseudo-Voigt) function for each phase (refined terms were U, V, W and X). The Simple\_Axial\_Model macro was used to model axial divergence. Other refined parameters included sample displacement, lattice parameters, and scale factors. Phase ratios were calculated assuming no amorphous/non-diffracting material.

Table S1: Crystal data of the wurtzite-kesterite CZTS

|                                       |                                                                                |
|---------------------------------------|--------------------------------------------------------------------------------|
| Formula                               | $\text{Cu}_2\text{ZnSnS}_4$                                                    |
| Crystal system                        | Monoclinic                                                                     |
| Space group                           | Pc                                                                             |
| Unit cell dimensions                  | $a = 7.7077 \text{ \AA}$ ; $b = 6.6630 \text{ \AA}$ ; $c = 6.3482 \text{ \AA}$ |
| Cell volume                           | $0.3260 \text{ nm}^3$                                                          |
| Number of formula units per unit cell | 2                                                                              |
| Number of atoms in the cell           | 16                                                                             |

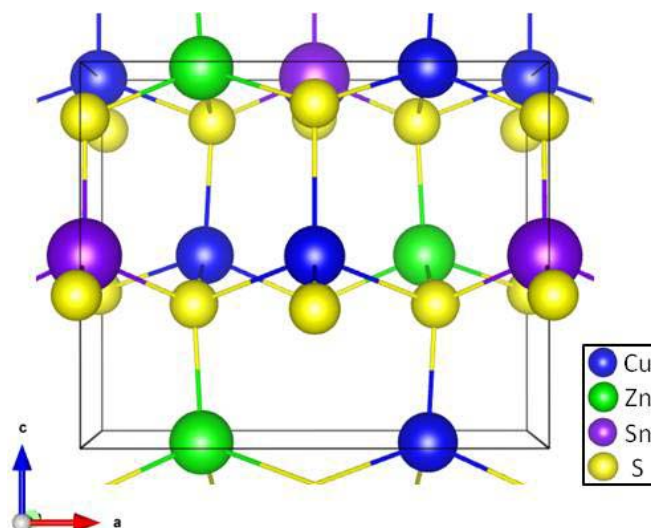

**Fig. S1** Crystal structure of wurtzite  $\text{Cu}_2\text{ZnSnS}_4$ .

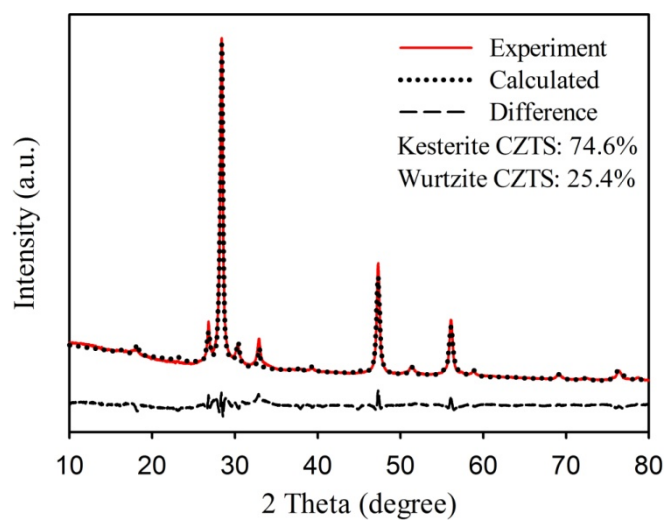

**Fig. S2** Relative abundance of kesterite and wurtzite phase in CZTS\_TAA based on refined experimental XRD data (goodness-of-fit indicator,  $S (= R_{wp}/R_e) = 4.87$ ). The lower black line with few spikes indicates the standard deviation of the calculated XRD data compared to the experimental data.
